# Supplementary material for: The contribution of Kv2.2‐mediated currents decreases during the postnatal development of mouse dorsal root ganglion neurons
Source: PubMed Central journal article supplement (PMC4814888; doi:10.14814/phy2.12731), 2016-03-31

Figure S1

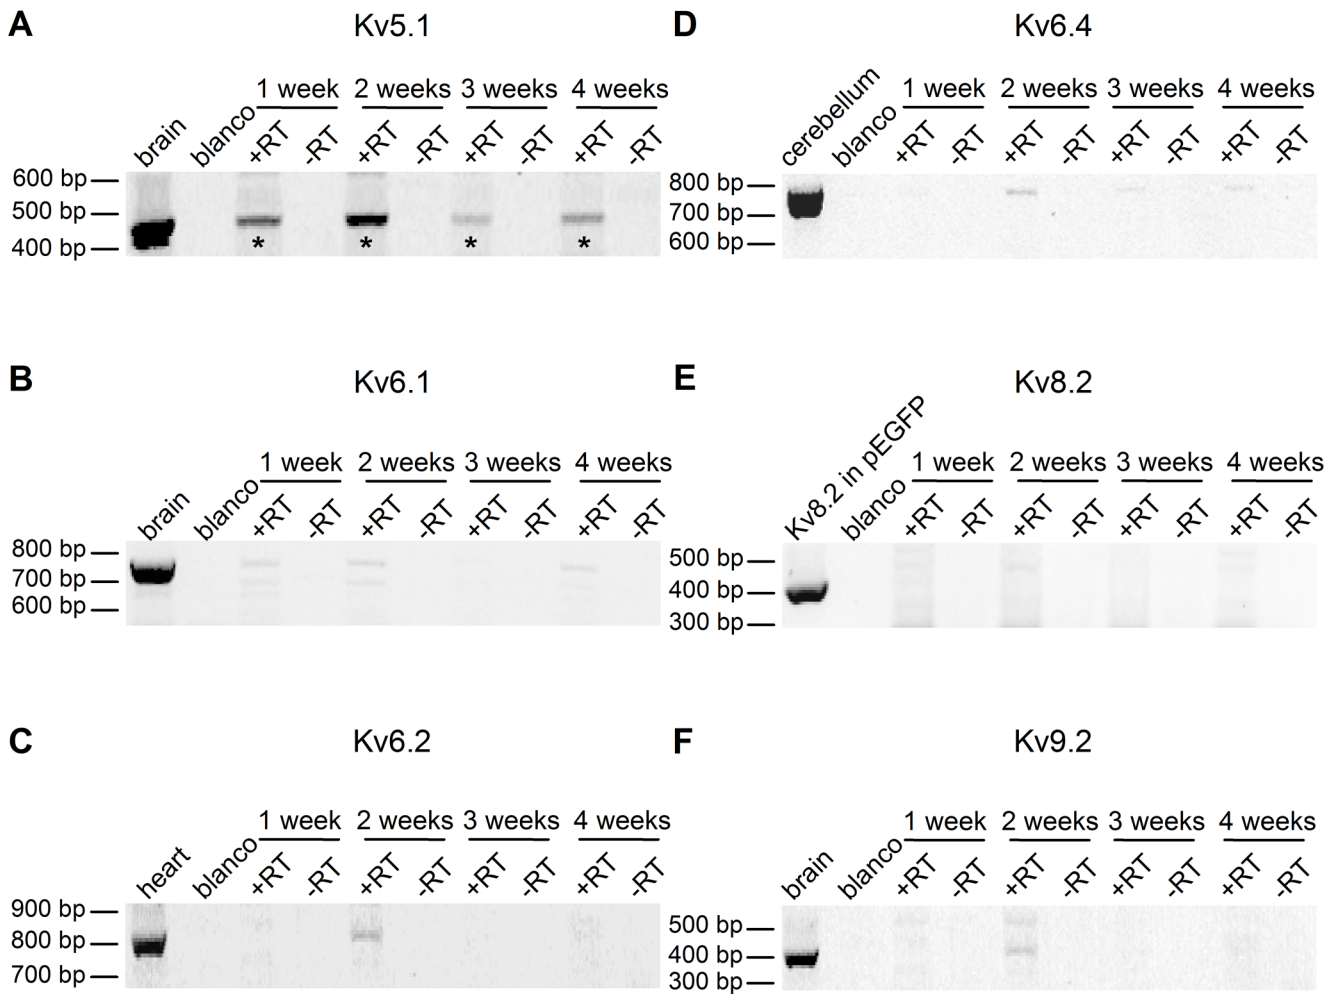

Supplement: PHY2-4-e12731-s001.pdf [file PHY2-4-e12731-s001.pdf]
